# Supplementary material
Source: publisher figshare collection journal article supplement (https://karger.figshare.com/articles/dataset/_/6955052)

## Supplemental Material

# **Disassembly of Subplasmalemmal Actin Filaments Induces Cytosolic $\text{Ca}^{2+}$ Increases in *Astropecten aranciacus* Eggs**

Filip Vasilev<sup>a</sup> Nunzia Limatola<sup>a</sup> Dae-Ryoung Park<sup>b</sup> Uh-Hyun Kim<sup>b</sup>  
Luigia Santella<sup>a</sup> Jong Tai Chun<sup>a</sup>

<sup>a</sup>Department of Biology and Evolution of Marine Organisms, Stazione Zoologica Anton Dohrn, Napoli, Italy

<sup>b</sup>Chonbuk National University, Jeon Ju, Korea

**Supplemental Video 1.** The first wave of instantaneous  $\text{Ca}^{2+}$  increases in the *A. aranciacus* eggs exposed to 6  $\mu\text{M}$  LAT-A. The time labeling refers to min:sec after the drug addition to the media.

**Supplemental Video 2.** Multiplicity of the LAT-A-induced  $\text{Ca}^{2+}$  waves in the *A. aranciacus* eggs exposed to 6  $\mu\text{M}$  LAT-A. The time labeling refers to min:sec after the drug addition to the media.

**Supplemental Video 3.** The  $\text{Ca}^{2+}$  wave gone astray in the *A. aranciacus* eggs microinjected with phalloidin prior to the LAT-A incubation. Instead of displaying a planar  $\text{Ca}^{2+}$  wave sweeping to the antipode, the wave front in these eggs often exhibited a circulating pattern of propagation along the plasma membrane.

**Supplemental Data 1.** Purity of the bacterially expressed proteins RFP-SH2 (circa 56 kDa) and RFP (circa 29 kDa). The recombinant proteins tagged with 6xHis were expressed in BL21 strain of *E. coli* and purified with nickel affinity chromatography and the subsequent dialysis in the microinjection buffer (10 mM Hepes, 450 mM KCl, pH 7.4). **(A)** 30  $\mu\text{g}$  of purified proteins were resolved in 10% SDS PAGE gel and stained with Coomassie Brilliant Blue R-250. **(B)** The same recombinant proteins were microinjected into *A. aranciacus* eggs (10  $\mu\text{g}/\mu\text{l}$  in pipette) and visualized by confocal microscopy.

**A**

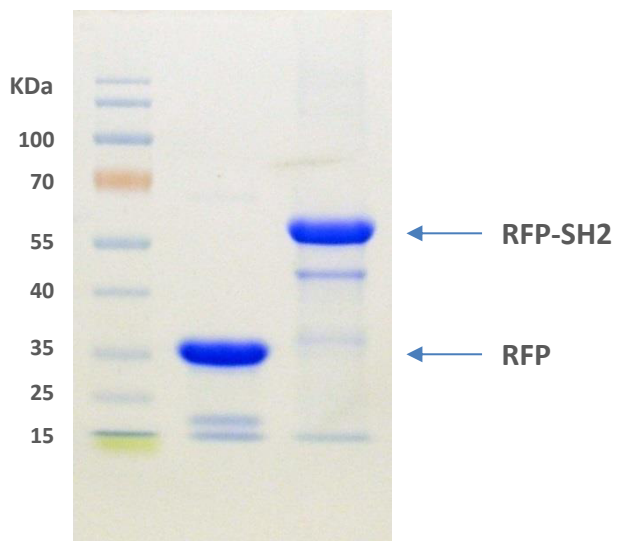

**B**

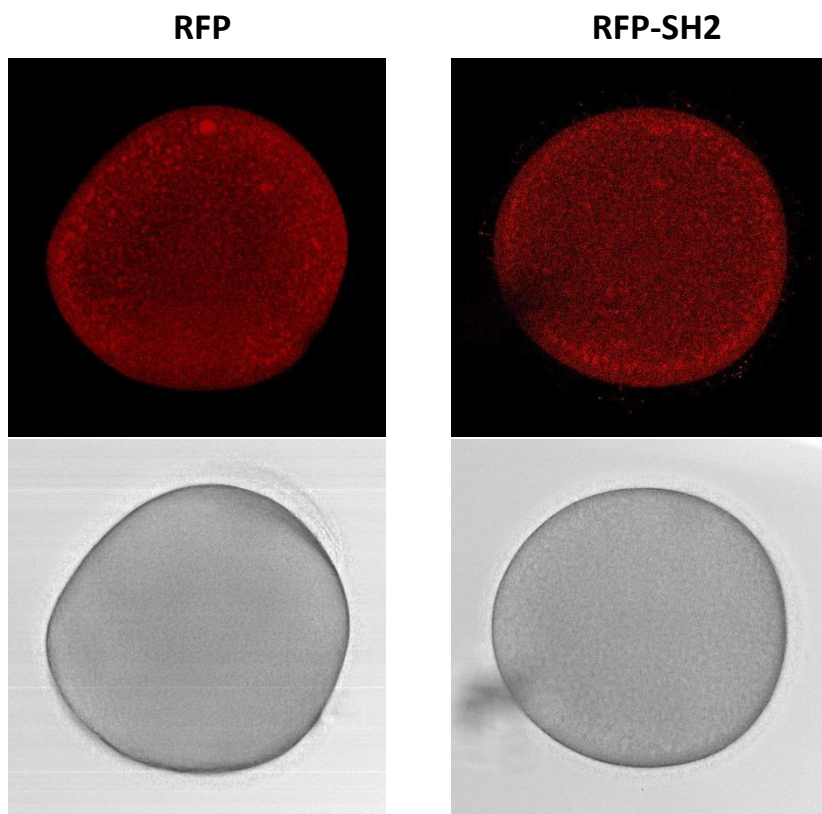

Supplement: Supplementary file 1 [file 1]
